# Supplementary material for: On-site, rapid and visual method for nanomolar Hg2+ detection based on the thymine–Hg2+–thymine triggered “double” aggregation of Au nanoparticles enhancing the Tyndall effect
Source: Royal Society of Chemistry journal article supplement (doi:10.1039/d1ra07211k), 2021-01-01
Supplement: d1ra07211k1.pdf [file d1ra07211k1.pdf]

1  
2  
3  
4  
5  
6  
7  
8  
9  
10  
11  
12  
13  
14  
15  
16  
17  
18  
19  
20  
21  
22  
23  
24

Electronic Supplementary Information

**On-site, rapid and visual method for nanomolar Hg<sup>2+</sup> detection  
based on the thymine-Hg<sup>2+</sup>-thymine triggered “double”  
aggregation of Au nanoparticles enhancing the Tyndall effect**

Xuejiang Chen, Yao Sun, Xiaomei Mo, Qian Gao, Yanan Deng, Miao Hu, Jianmei  
Zou, Jinfang Nie\*, Yun Zhang\*

*College of Chemistry and Bioengineering, Guilin University of Technology, Guilin  
541004, P. R. China*

\* Corresponding Author.

E-mail: zy@glut.edu.cn, Niejinfang@glut.edu.cn.

Tel: +86 773 5896453; Fax: +86 773 5896839.

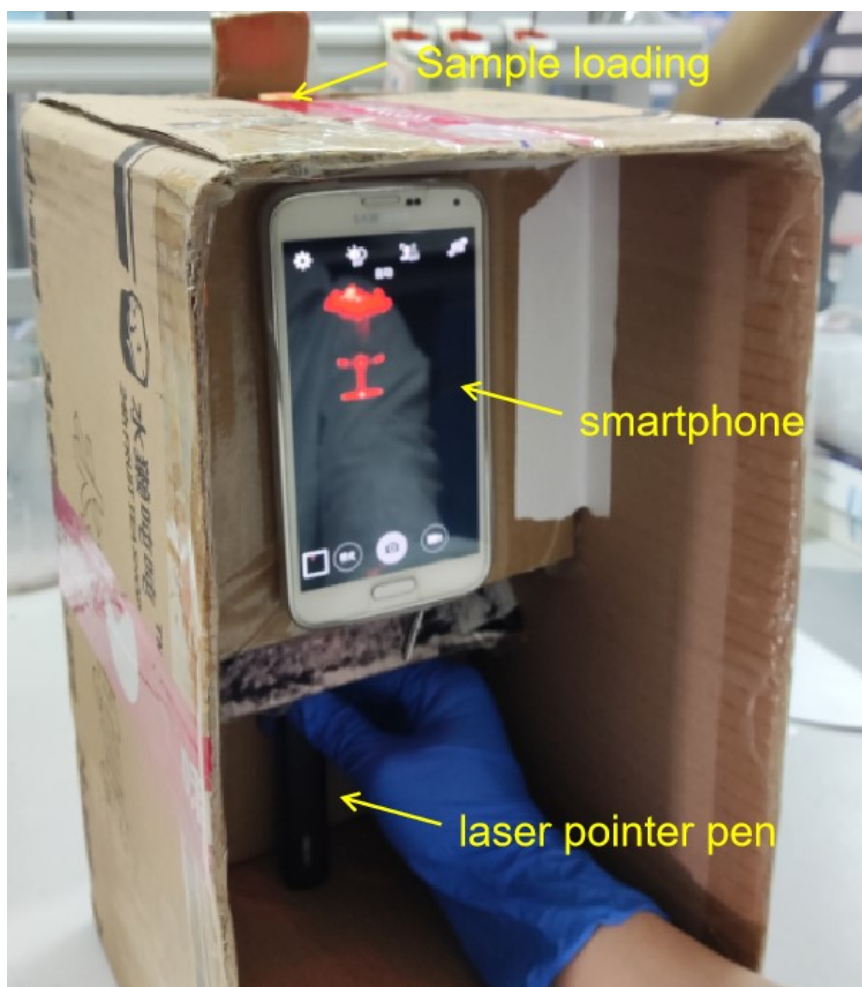

1  
2

3 **Fig. S1** The photograph of the home-made fully-enclosed device providing stable  
4 “black” environmental condition.

5

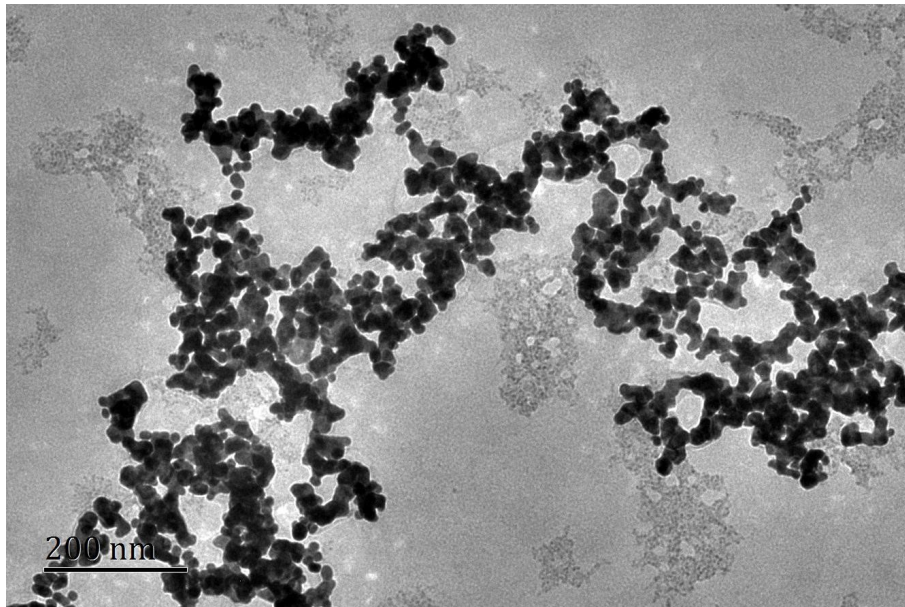

1

2

3 **Fig. S2** Transmission electron microscope image obtained from the freshly-prepared  
4 AuNPs in the buffer containing 450 mM NaCl and three types of ssDNAs in the  
5 presence of 10  $\mu\text{M}$   $\text{Hg}^{2+}$ .

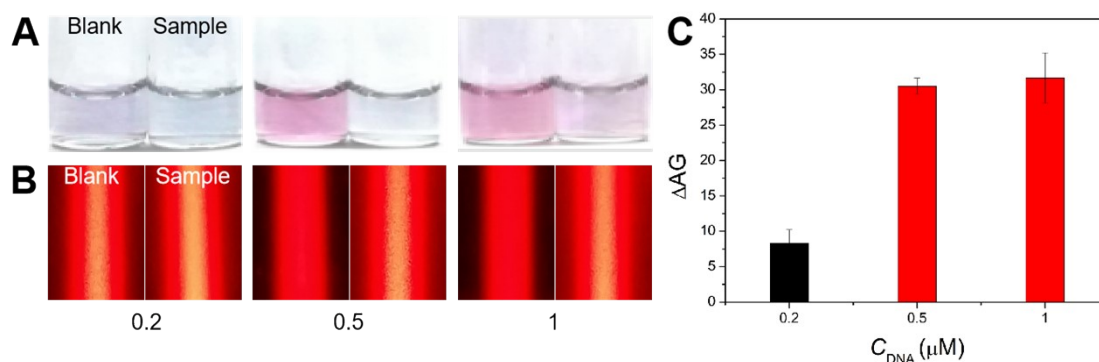

1  
2  
3 **Fig. S3** (A) SPR-related colorimetric results obtained from the assays of 10 μM Hg<sup>2+</sup>  
4 (right) and blank samples (buffer without the analyte; left) with different concentrations  
5 of the three types of ssDNAs (μM). Other experimental conditions: NaCl concentration,  
6 450 mM; incubation time for the reactions between the ssDNA and Hg<sup>2+</sup> sample, 10  
7 min; time for the AuNPs' incubation, 0 min; incubation temperature, room temperature.  
8 (B) TE images recorded for the mixture solutions shown in (A). (C) AG changes  
9 (ΔAGs) between the Hg<sup>2+</sup> samples and blank samples shown in (B). Each error bar  
10 represents a standard deviation across three replicate experiments. The results show that  
11 no significant difference was observed between the ΔAG values obtained with 0.5 and  
12 1.0 μM ssDNA. Therefore, the ssDNA level of 0.5 μM was chosen as the optimal  
13 concentration for all of the following experiments.

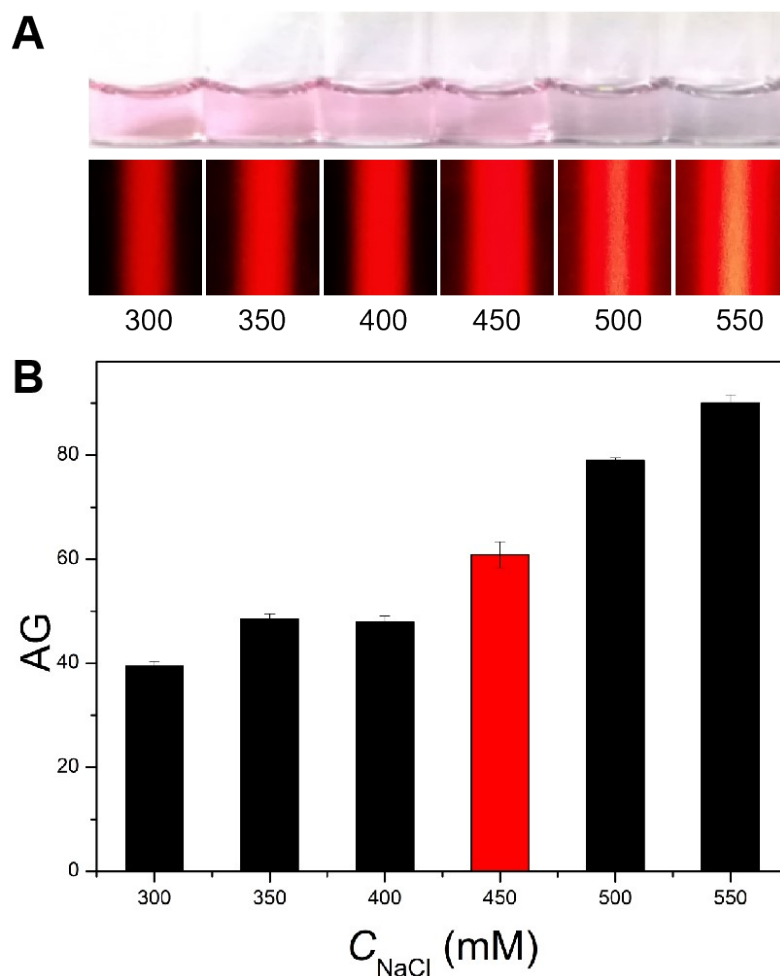

1  
2  
3 **Fig. S4** (A) SPR-related colorimetric results (top) and TE images obtained from the  
4 reactions between the three types of ssDNAs (0.5  $\mu$ M each) and the AuNPs in buffer  
5 containing different NaCl concentrations (mM). Other experimental conditions:  
6 incubation time for the reactions between the ssDNA and Hg<sup>2+</sup> sample, 10 min; time  
7 for the AuNPs' incubation, 0 min; incubation temperature, room temperature. (B) AG  
8 values measured from the mixture solutions shown in (A). Each error bar represents a  
9 standard deviation across three replicate experiments. The results show that as the NaCl  
10 concentration increases, the degree of the AuNPs' aggregation increased and the TE  
11 intensity gradually increased. The AuNP solution was able to remain red (relatively  
12 dispersed) when the NaCl concentration reached 450 mM, which was chosen as the  
13 optimal concentration for all of the following experiments.

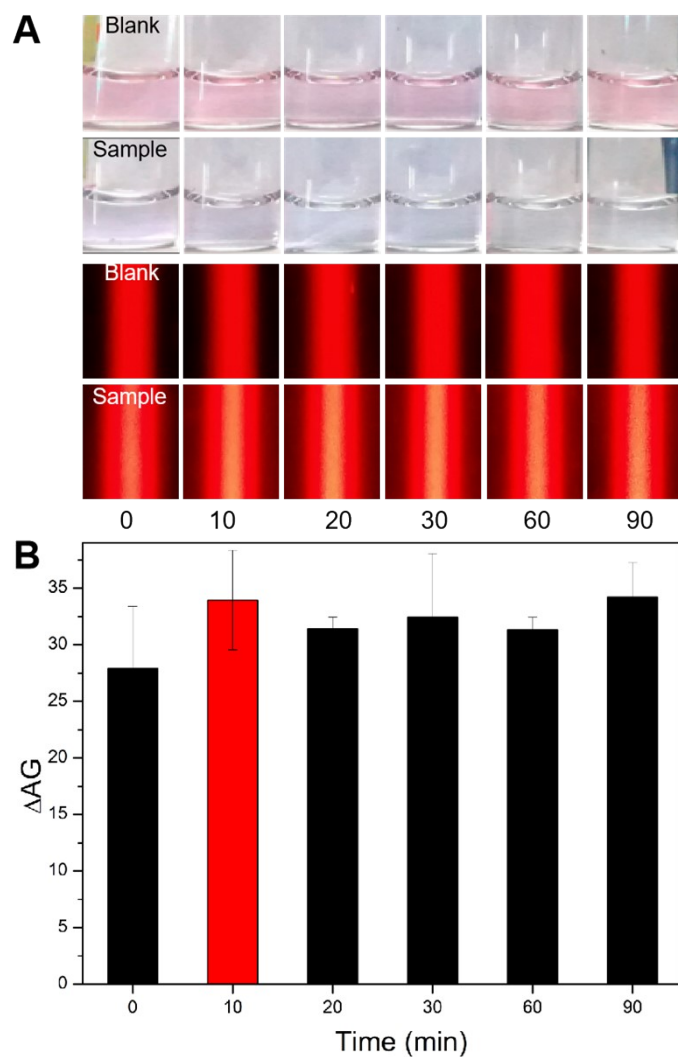

1  
2  
3 **Fig. S5** (A) SPR-related colorimetric results (top) and TE results obtained from the  
4 assays of 10  $\mu\text{M}$   $\text{Hg}^{2+}$  and blank samples (buffer without the analyte) with different  
5 incubation time for the reactions between the ssDNA and  $\text{Hg}^{2+}$  sample (min). Other  
6 experimental conditions: ssDNA concentration, 0.5  $\mu\text{M}$ ; NaCl concentration, 450 mM;  
7 time for the AuNPs' incubation, 0 min; incubation temperature, room temperature. (B)  
8 AG changes ( $\Delta\text{AG}$ s) between the  $\text{Hg}^{2+}$  samples and blank samples shown in (A). Each  
9 error bar represents a standard deviation across three replicate experiments. The results  
10 show that no significant  $\Delta\text{AG}$  difference was observed when the incubation time  
11 increased to 10 min, which was thus chosen as the optimal condition for all of the  
12 following experiments.

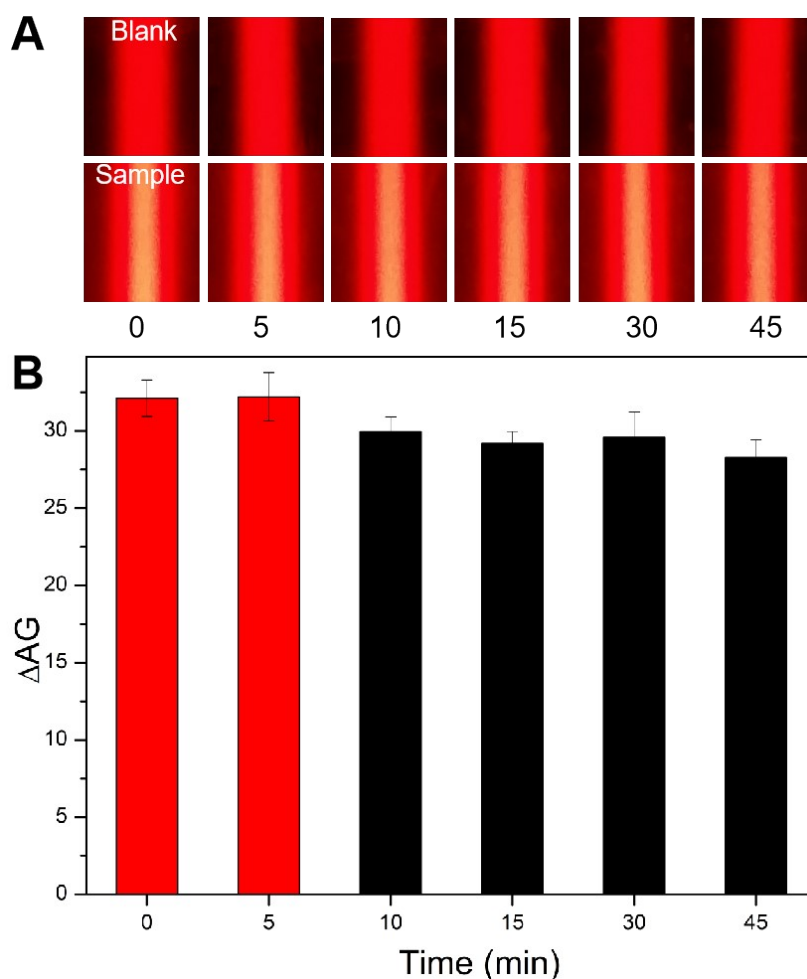

1  
2  
3 **Fig. S6** (A) TE results obtained from the assays of 10  $\mu\text{M}$   $\text{Hg}^{2+}$  and blank samples  
4 (buffer without the analyte) with different time for the AuNPs' incubation (min). Other  
5 experimental conditions: ssDNA concentration, 0.5  $\mu\text{M}$ ; NaCl concentration, 450 mM;  
6 incubation time for the reactions between the ssDNA and  $\text{Hg}^{2+}$  sample, 10 min;  
7 incubation temperature, room temperature. (B) AG changes ( $\Delta\text{AG}$ s) between the  $\text{Hg}^{2+}$   
8 samples and blank samples shown in (A). Each error bar represents a standard deviation  
9 across three replicate experiments. The results show that the highest  $\Delta\text{AG}$  values were  
10 achieved with the incubation time of 0 and 5 min. Thus, for all of the following  
11 experiments, the TE signal was immediately recorded after the mixing of AuNPs with  
12 each reaction solution of the ssDNA and  $\text{Hg}^{2+}$  sample.

13

1

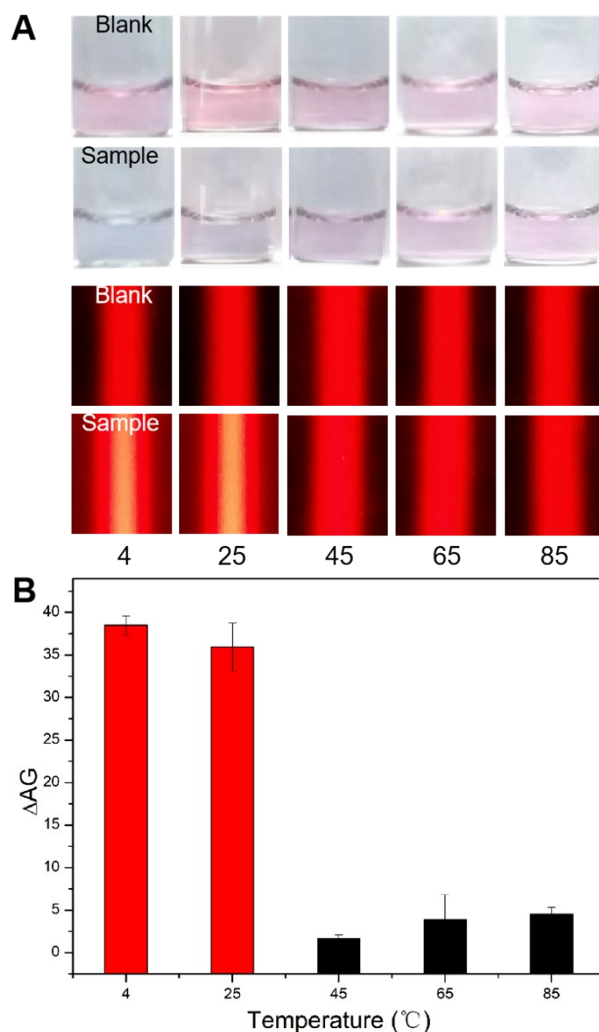

2  
3 **Fig. S7** (A) SPR-related colorimetric results (top) and TE results obtained from the  
4 assays of 10  $\mu\text{M}$   $\text{Hg}^{2+}$  and blank samples (buffer without the analyte) at different  
5 incubation temperatures ( $^{\circ}\text{C}$ ). Other experimental conditions: ssDNA concentration,  
6 0.5  $\mu\text{M}$ ; NaCl concentration, 450 mM; incubation time for the reactions between the  
7 ssDNA and  $\text{Hg}^{2+}$  sample, 10 min; time for the AuNPs' incubation, 0 min. (B) AG  
8 changes ( $\Delta\text{AG}$ s) between the  $\text{Hg}^{2+}$  samples and blank samples shown in (A). Each error  
9 bar represents a standard deviation across three replicate experiments. The results show  
10 that relatively high  $\Delta\text{AG}$  values were achieved at the incubation temperatures of 4 and  
11 25  $^{\circ}\text{C}$ . Thus, the room temperature of 25  $^{\circ}\text{C}$  was chosen as the optimal incubation  
12 temperature, as it was quite convenient for the experiment operation.



1 **Table S1** Recovery of Hg<sup>2+</sup> ions in several real water samples.

| Sample         | Found (nM) | Added (nM) | Total found (nM) | Recovery (%) | RSD <sup>a</sup> (% , n=3) |
|----------------|------------|------------|------------------|--------------|----------------------------|
| Tap water      | 0.00       | 500        | 536              | 107.19       | 6.46                       |
|                | 0.00       | 1500       | 1498             | 99.84        | 6.99                       |
|                | 0.00       | 2500       | 2609             | 104.37       | 1.37                       |
| Drinking water | 0.00       | 500        | 529              | 105.88       | 6.64                       |
|                | 0.00       | 1500       | 1405             | 93.68        | 4.75                       |
|                | 0.00       | 2500       | 2552             | 102.07       | 0.85                       |
| Pond water     | 0.00       | 500        | 544              | 108.71       | 5.91                       |
|                | 0.00       | 1500       | 1545             | 103.01       | 1.86                       |
|                | 0.00       | 2500       | 2642             | 105.69       | 2.53                       |

2 <sup>a</sup>RSD, relative standard deviation.
